# Supplementary material
Source: PubMed Central journal article supplement (PMC8827167)
Supplement: NIHMS1757881-supplement-12.pdf [file NIHMS1757881-supplement-12.pdf]

| Gene     | LCMV exhausted | HCC TILs | NSCLC TILs | CRC TILs | Melanoma TILs |
|----------|----------------|----------|------------|----------|---------------|
| HAVCR2   | X              | X        | X          | X        | X             |
| RGS16    | X              |          |            |          |               |
| LAYN     |                | X        | X          | X        |               |
| SRGAP3   | X              |          | X          | X        |               |
| DUSP4    | X              | X        | X          | X        |               |
| CSF1     | X              | X        | X          | X        | X             |
| TNFRSF9  | X              | X        | X          | X        | X             |
| LYST     |                | X        | X          | X        | X             |
| TNFRSF18 |                |          | X          | X        |               |
| NDFIP2   | X              | X        | X          | X        |               |
| SQLE     |                |          |            | X        |               |
| ID3      |                | X        |            |          |               |
| SOX4     |                |          |            | X        |               |
| CD9      | X              |          |            |          |               |
| PHLDA1   | X              | X        | X          | X        | X             |
| CCL3     |                | X        | X          | X        | X             |
| CCL4     | X              |          |            |          |               |
| KLRC1    | X              |          |            |          |               |
| KLRD1    |                |          |            |          |               |
| KLRB1    | X              |          |            |          |               |
| KLRC2    |                |          | X          |          |               |
| CDK6     | X              |          | X          | X        |               |
| PLS3     | X              |          |            |          |               |
| AFAP1L2  |                | X        |            | X        |               |
| CTSW     |                |          |            |          |               |
| IL2RA    |                |          |            |          |               |
| AHI1     |                |          |            | X        |               |
| RBPJ     | X              |          | X          | X        |               |
| GZMB     |                | X        | X          | X        |               |
| GNLY     |                |          |            |          |               |

**Table S5:** Table of dysfunction signature genes (N=30). X marks genes that are upregulated in LCMV exhausted T cells or defines dysfunctional TILs in scRNA-seq experiments. HCC (hepatocellular carcinoma), NSCLC (non-small-cell lung cancer), CRC (colorectal carcinoma), LCMV (lymphocytic choriomeningitis virus). Related to Figures 3 and S3.
