# Supplementary material
Source: PubMed Central journal article supplement (PMC8827167)

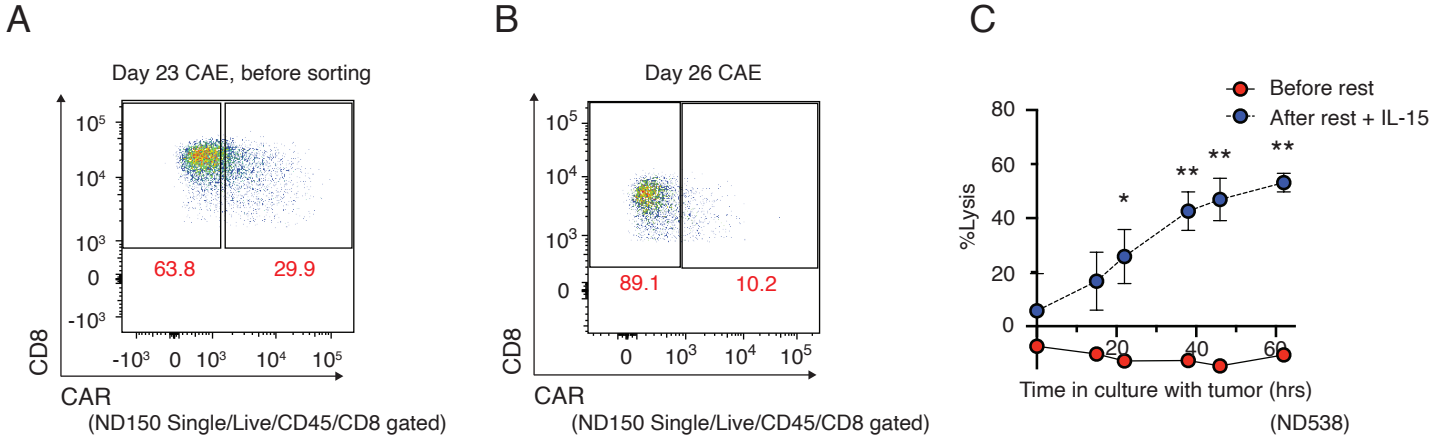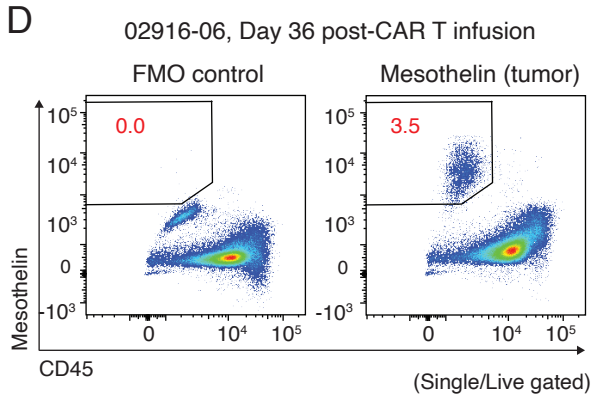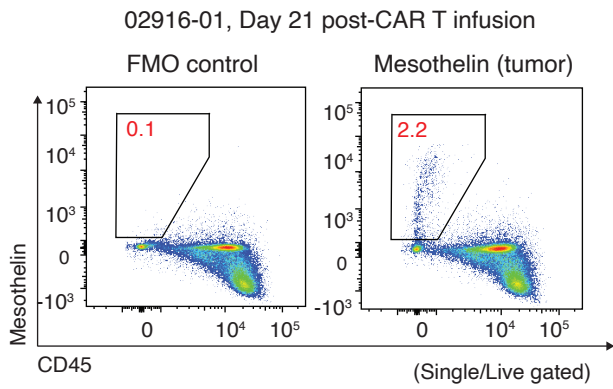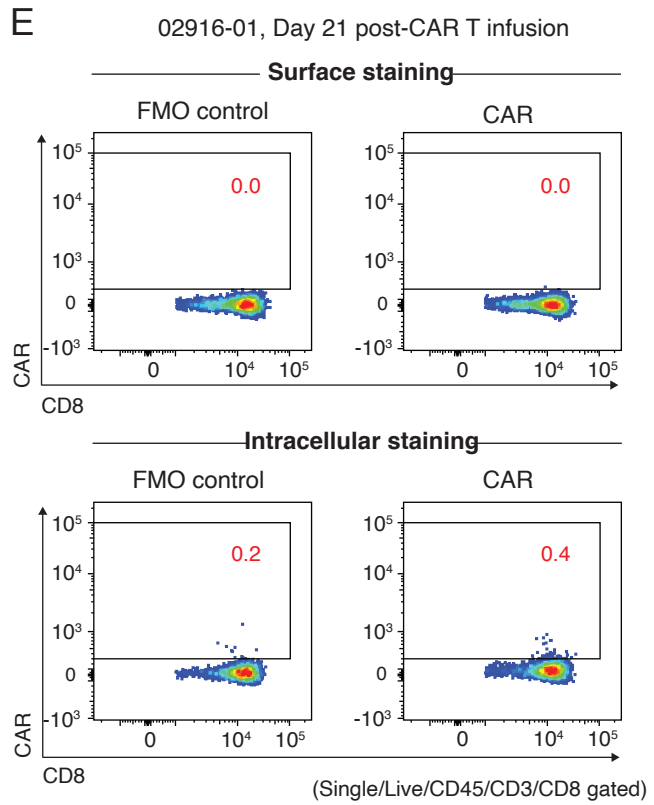

Supplement: NIHMS1757881-supplement-2.pdf [file NIHMS1757881-supplement-2.pdf]

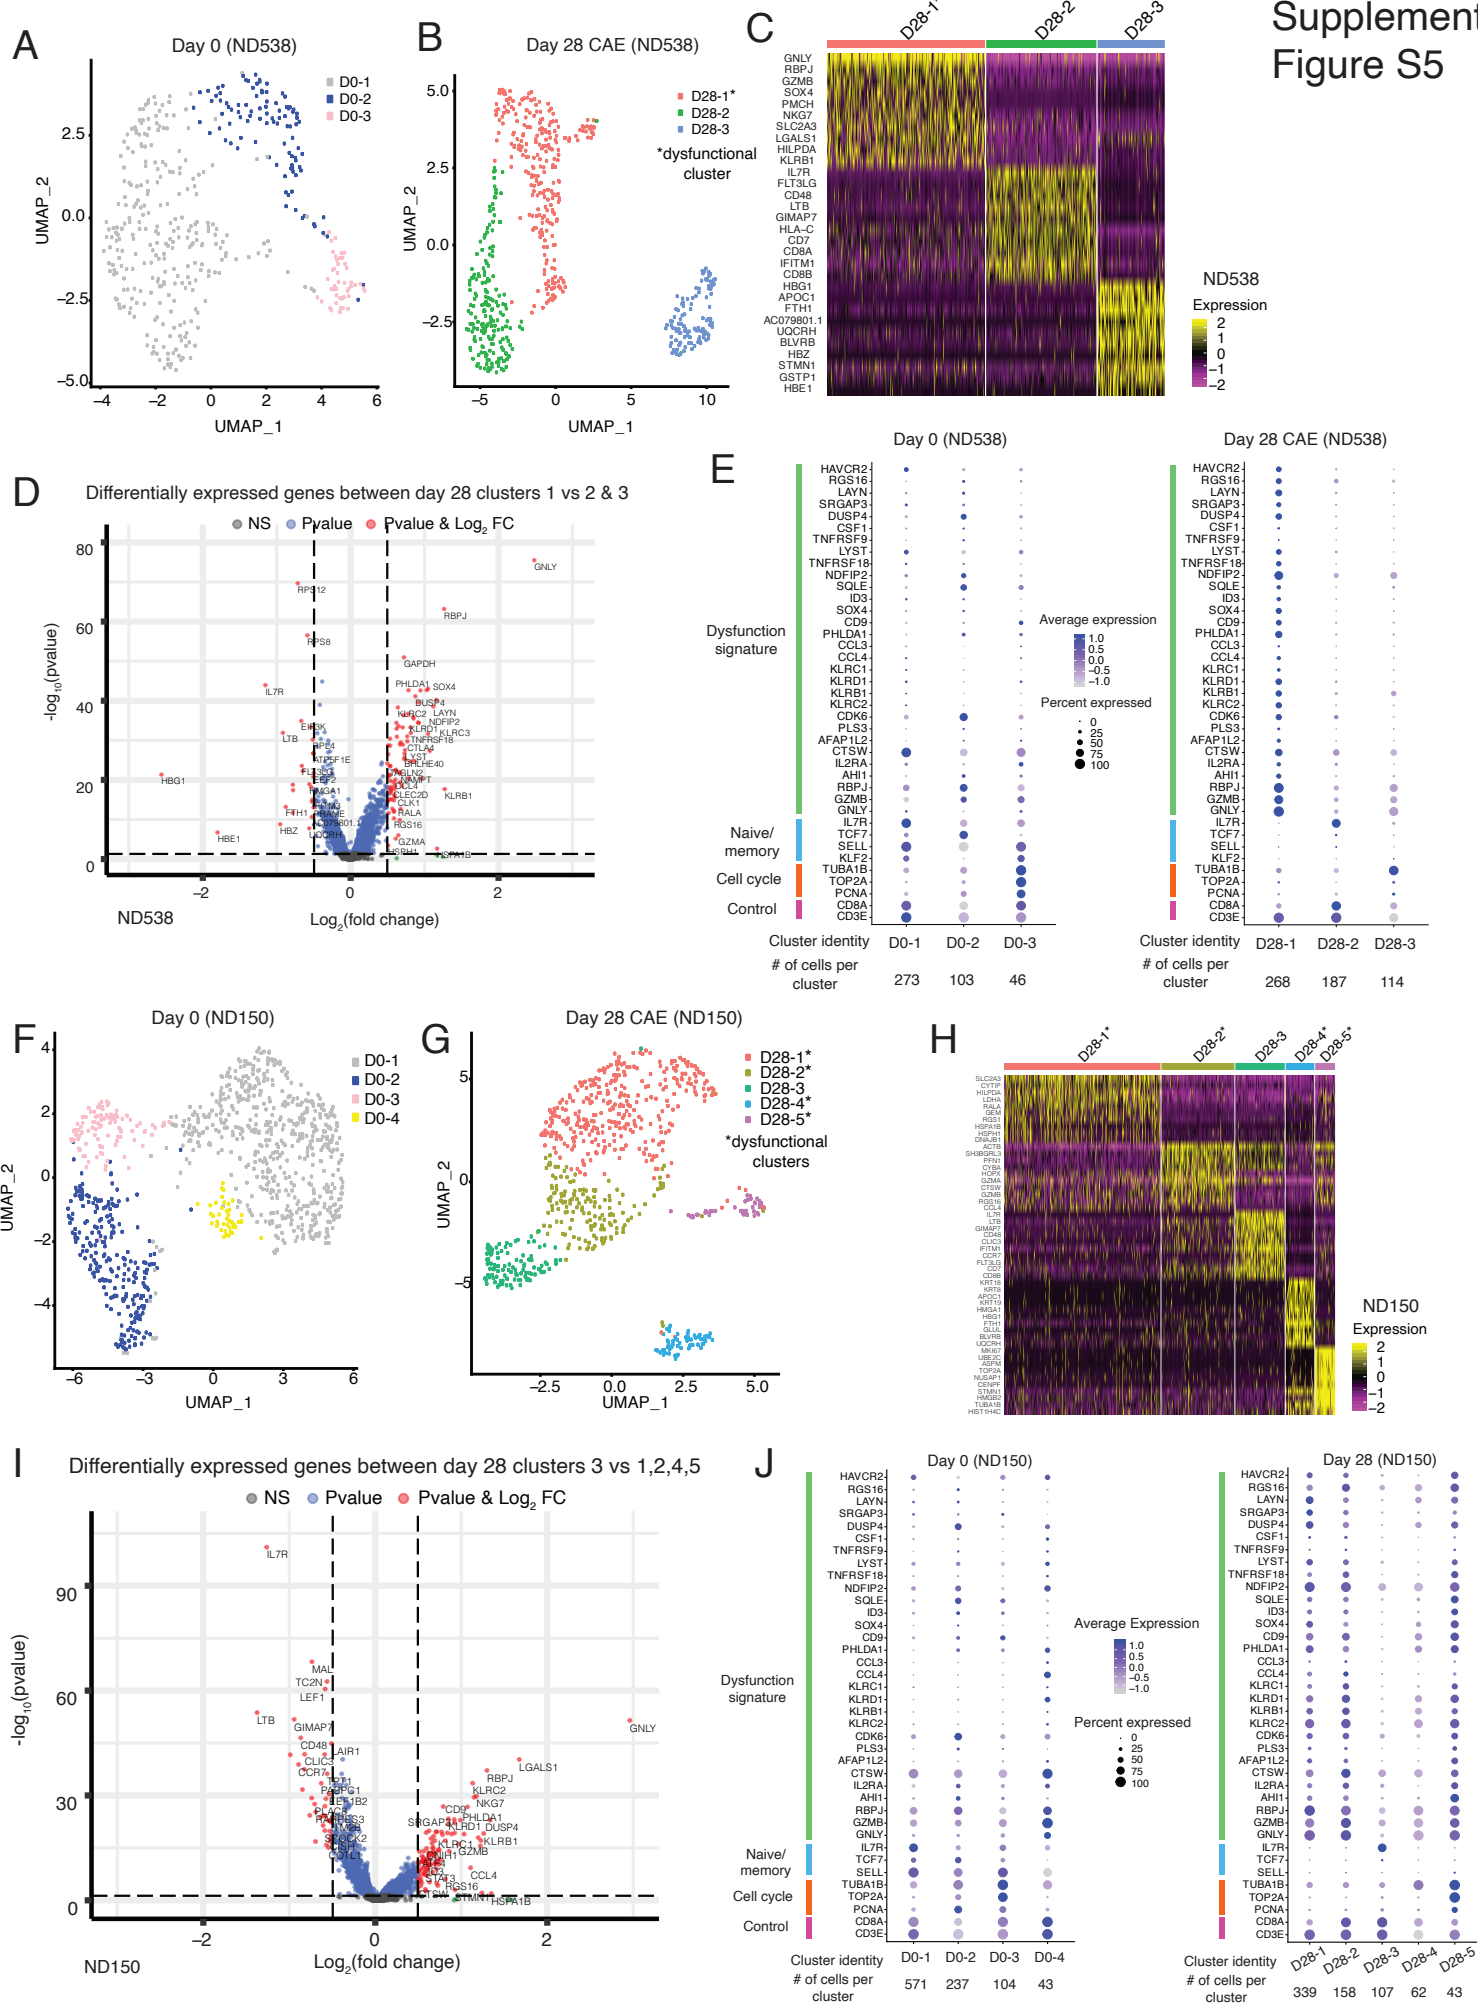

Supplement: NIHMS1757881-supplement-5.pdf [file NIHMS1757881-supplement-5.pdf]
